# Supplementary material
Source: MDPI journal article supplement (https://www.mdpi.com/2312-7481/4/1/1)
Supplement: s1 [file s1]

**Table S1. Predicted CaMK phosphorylation sites of MyBP-C N-terminal fragments identified using GPS 3.0 (medium threshold).**

| Fragment | Amino Acid |     |      |                   |      |      |      |
|----------|------------|-----|------|-------------------|------|------|------|
| ssC1C2   | S55        | T92 | T125 | S252 <sup>a</sup> | S296 | S316 | S333 |
| fsC1C2   | N/D*       | T81 | T110 | S250              | S294 | N/D  | N/D  |
| C0C2     | N/D        | N/D | N/D  | S358              | S402 | S423 | S440 |

<sup>a</sup> Predicted CaMK phosphorylation site maps to region corresponding to the linker between the M-motif and C2 domain in cMyBP-C as reported by Michie *et al* 2016. This residue has also been identified in the NCBI ClinVar Database as likely to be pathogenic; \*N/D – phosphorylation sites were not predicted at these positions.

**Table S2. Amino acid sequences show conservation between mouse and human M-motif regions.**

| Type                | Amino acid sequence                     |
|---------------------|-----------------------------------------|
| Slow Skeletal Mouse | IDVWEL LKNANP NEYEKIAFQYG ITD LRGMLKRLK |
| Cardiac Mouse       | EDVWEI LRQAPP SEYERIAFQHGVTD LRGMLKRLK  |
| Cardiac Human       | EDVWEI LRQAPP SEYE RIAFQYGVTD LRGMLKRLK |
