# Supplementary material
Source: MDPI journal article supplement (https://www.mdpi.com/2312-7481/4/1/1)
Supplement: s1 [file s1]

Archive with 3 entries (3 files):
- Supplementary_TableS.pdf
- FigS1A_Final_R_MC_SUB.tif
- FigS1B_Final_R_MC_SUB.tif
