# Supplementary material
Source: MDPI journal article supplement (https://www.mdpi.com/2312-7481/4/1/1)

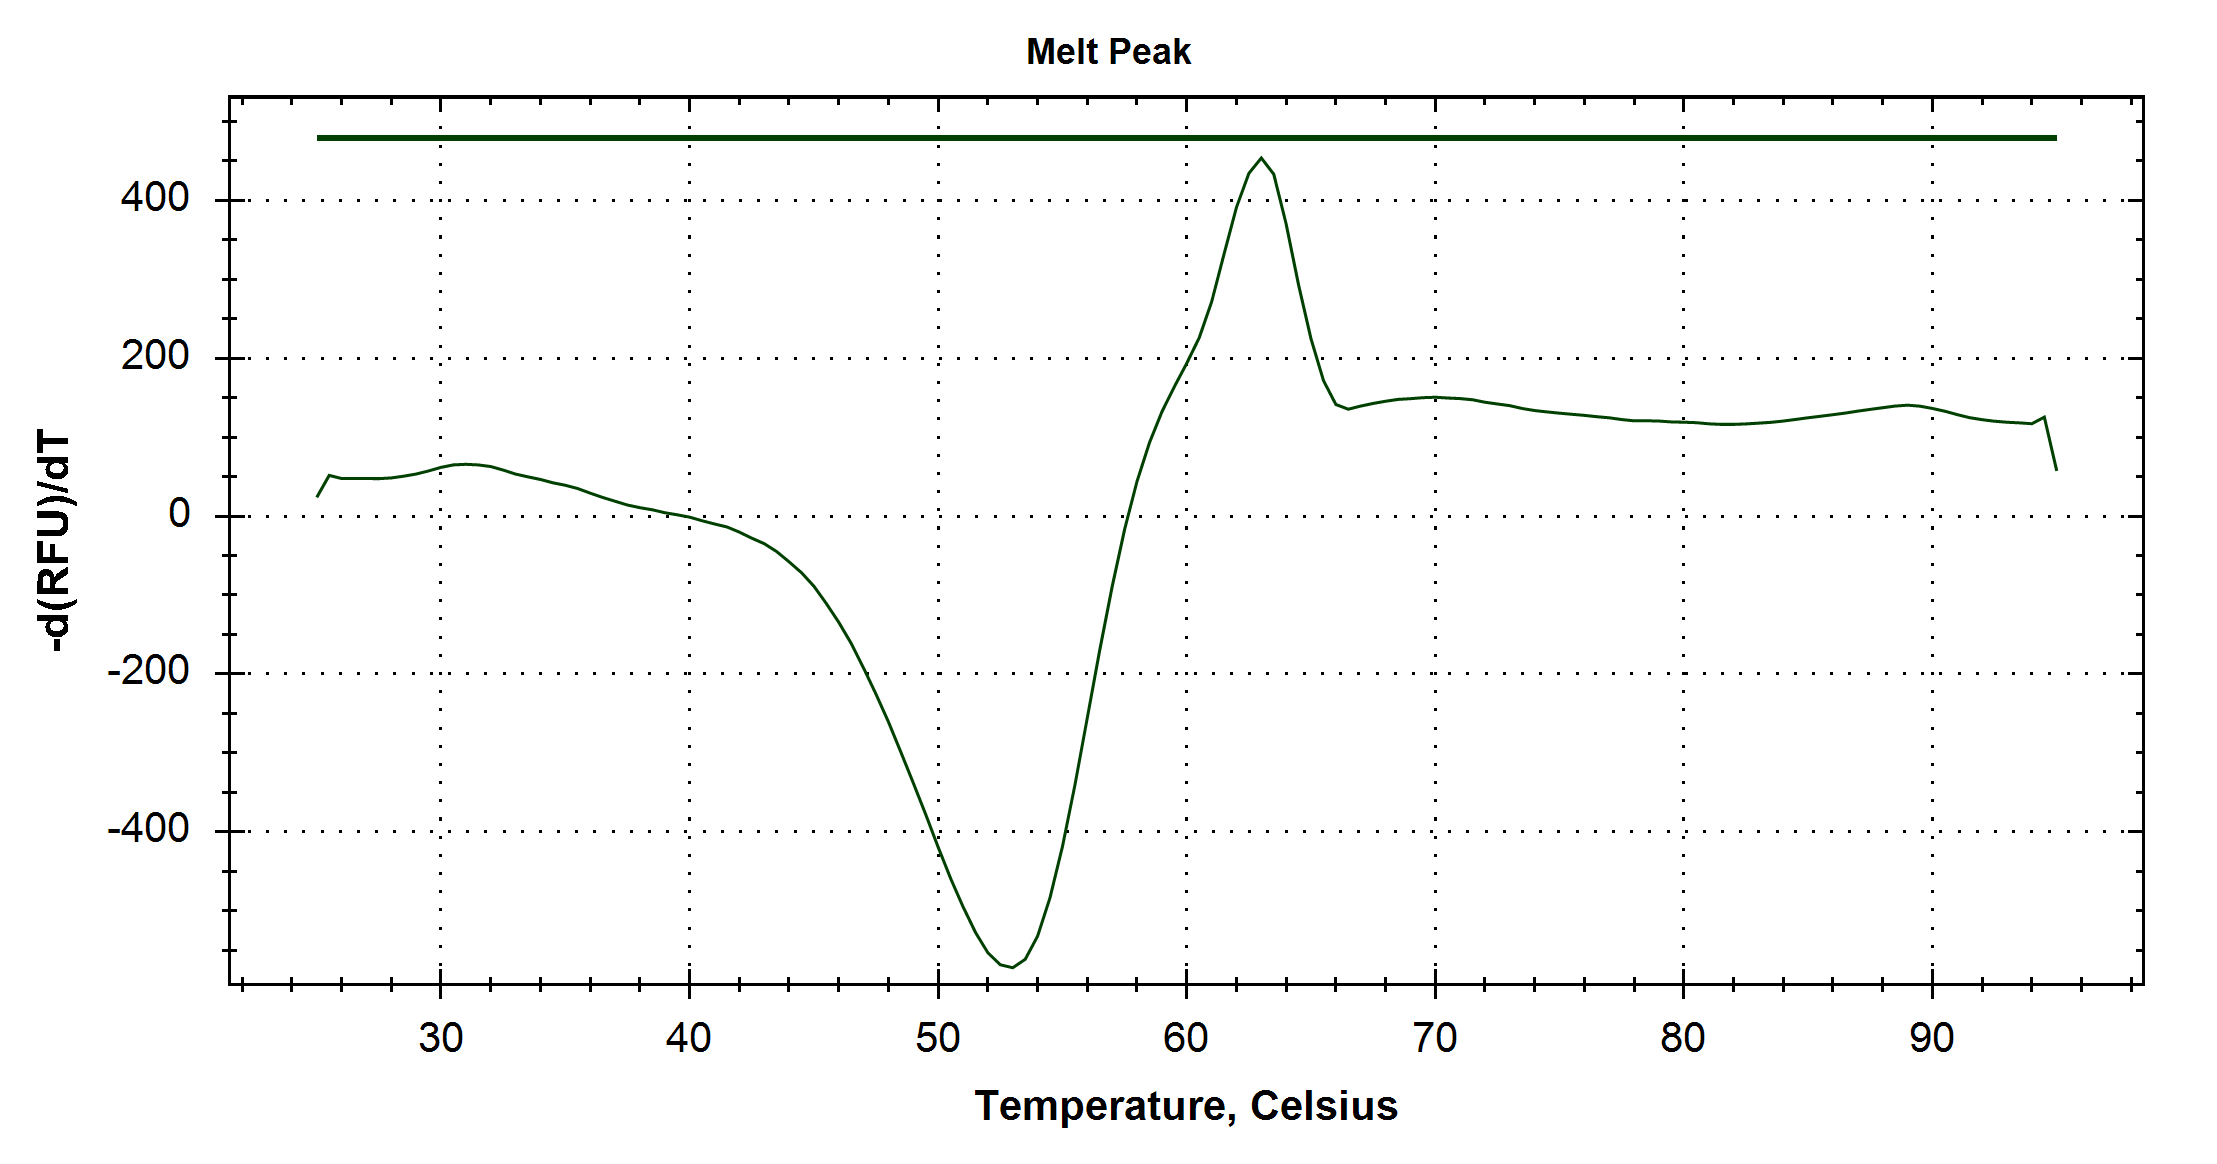

Supplement: s1 [file s1 › FigS1A_Final_R_MC_SUB.tif]

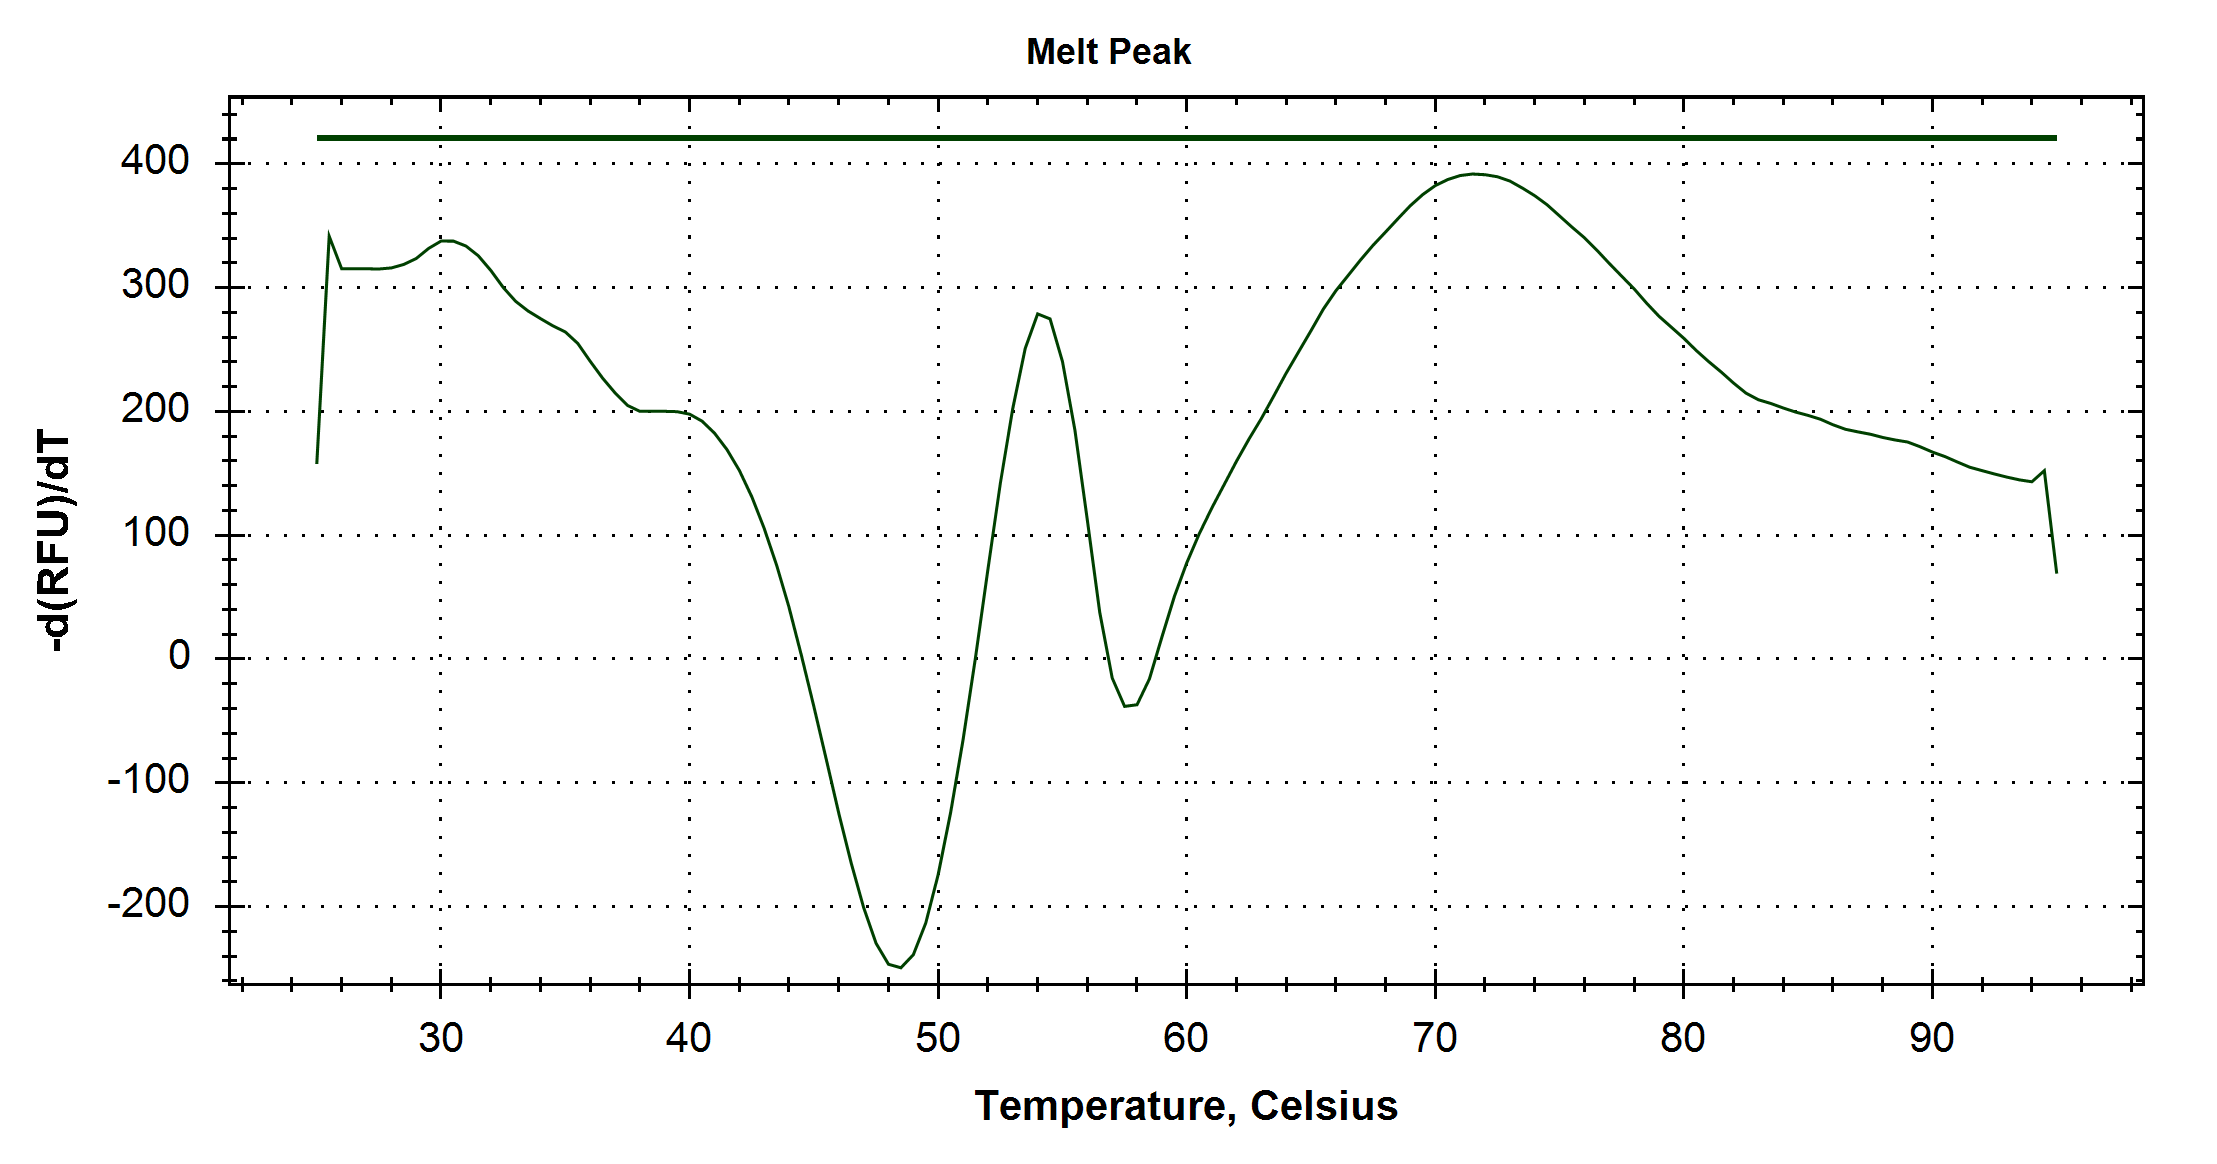

Supplement: s1 [file s1 › FigS1B_Final_R_MC_SUB.tif]
